# Supplementary material for: Structural design of FeCo alloy implanted into N,S co-doped carbon nanotubes via self-catalyzed growth for advanced liquid and flexible all-state-state Zn–air battery
Source: Royal Society of Chemistry journal article supplement (doi:10.1039/d3nr04491b), 2023-01-01
Supplement: d3nr04491b1.pdf [file d3nr04491b1.pdf]

**Structural design of FeCo alloy implanted into N, S co-doped carbon nanotubes  
via self-catalyzed growth for advanced liquid and flexible all-state-state Zn-air  
battery**

Kun Wang,<sup>a†</sup> Liyuan Wang,<sup>a†</sup> Jinrui Huang,<sup>a</sup> Ye Chen,<sup>a</sup> Xupo Liu,<sup>a</sup> Tianfang Yang,<sup>b</sup>  
Gangya Wei<sup>b</sup> and Shuyan Gao<sup>\*a,b</sup>

*†Kun Wang and Liyuan Wang made equal contributions to this work.*

*<sup>a</sup> School of Materials Science and Engineering, Henan Normal University, Xixiang, Henan  
453007, P.R. China*

*<sup>b</sup> School of Chemistry and Chemical Engineering, Henan Normal University, Xixiang, 453007,  
P.R. China*

*\*Corresponding author E-mail: shuyangao@htu.cn*

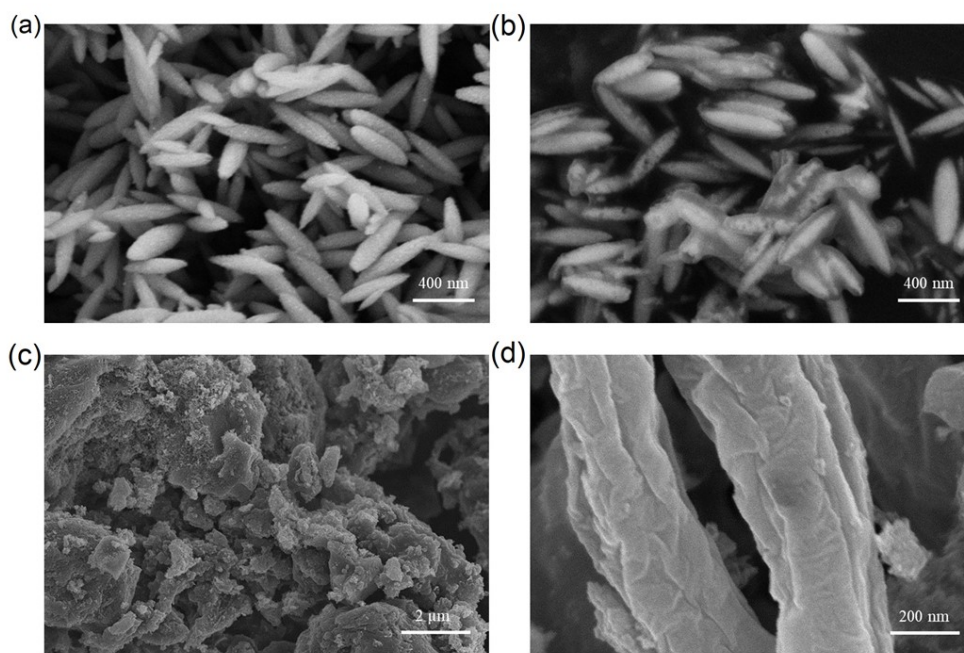

**Fig. S1** SEM images of (a) Fe<sub>2</sub>O<sub>3</sub>, (b) Fe<sub>2</sub>O<sub>3</sub>/Co@C, (c) Co-NSC and (d) Fe-NSCNTs.

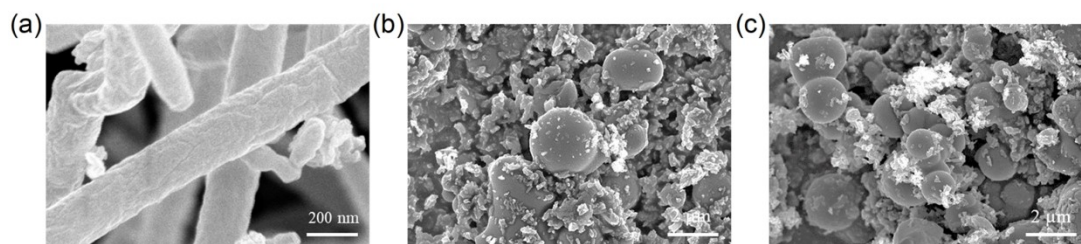

**Fig. S2** SEM images of (a) FeCo-NCNTs, (b) FeCo-SC, (c) FeCo-C.

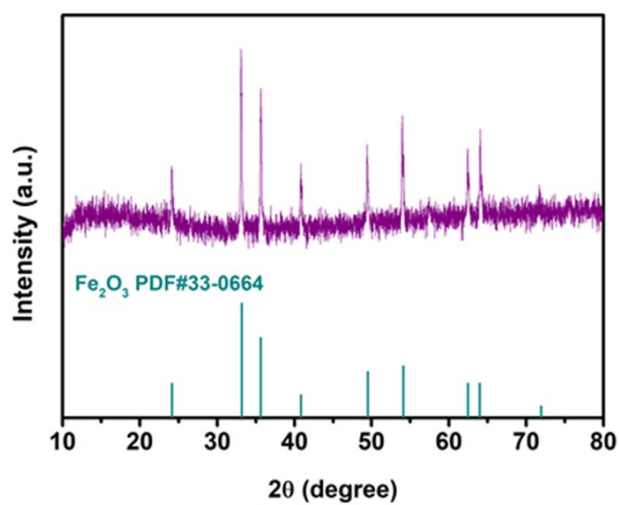

**Fig. S3** XRD patterns of Fe<sub>2</sub>O<sub>3</sub>.

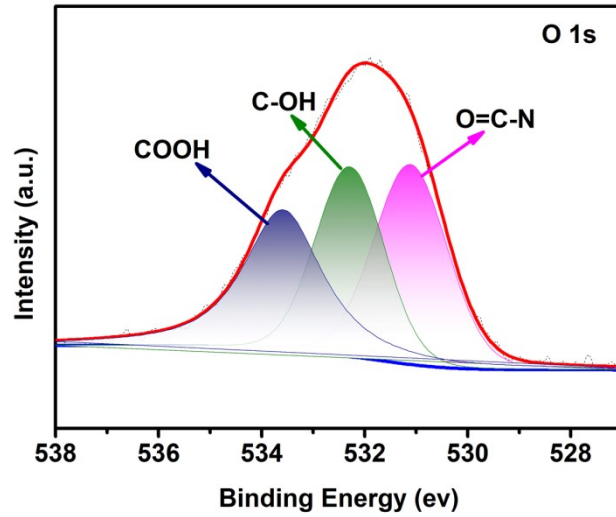

Fig. S4 O 1s spectra of FeCo<sub>10</sub>-NSCNTs.

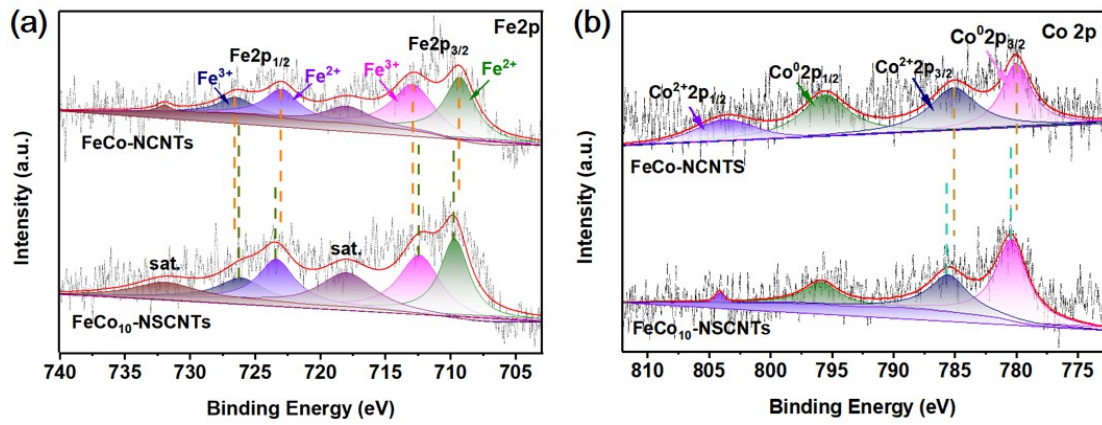

Fig. S5 (a) Fe 2p of FeCo-NCNTs and FeCo<sub>10</sub>-NSCNTs, (b) Co 2p of FeCo-NCNTs and FeCo<sub>10</sub>-NSCNTs.

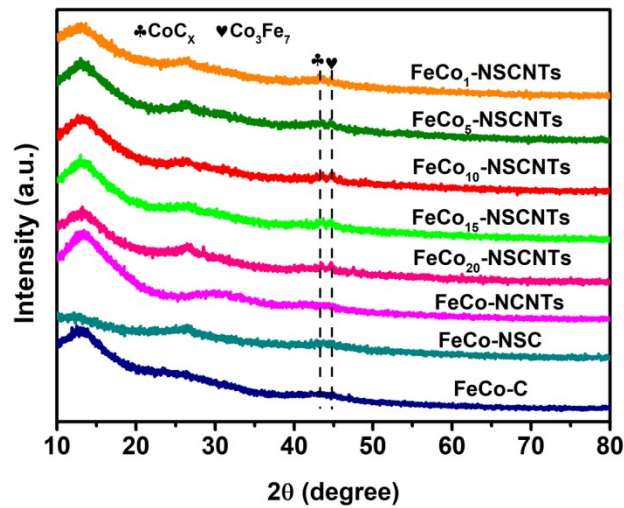

Fig. S6 XRD patterns of FeCo<sub>1</sub>-NSCNTs, FeCo<sub>5</sub>-NSCNTs, FeCo<sub>10</sub>-NSCNTs, FeCo<sub>15</sub>-NSCNTs, FeCo<sub>20</sub>-NSCNTs, FeCo-NCNTs, FeCo-NSC and FeCo-C.

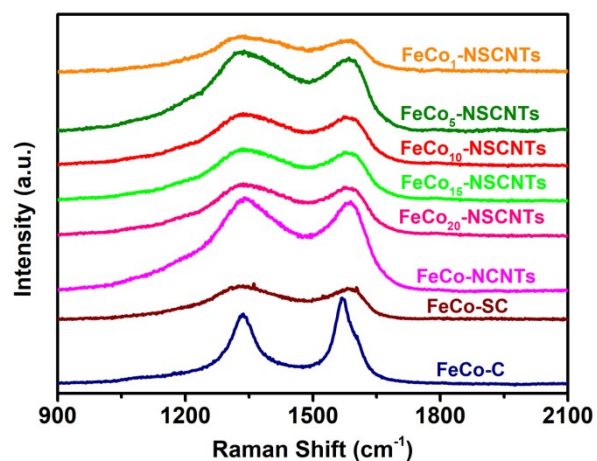

**Fig. S7** Raman spectra of FeCo<sub>1</sub>-NSCNTs, FeCo<sub>5</sub>-NSCNTs, FeCo<sub>10</sub>-NSCNTs, FeCo<sub>15</sub>-NSCNTs, FeCo<sub>20</sub>-NSCNTs, FeCo-NCNTs, FeCo-SC and FeCo-C.

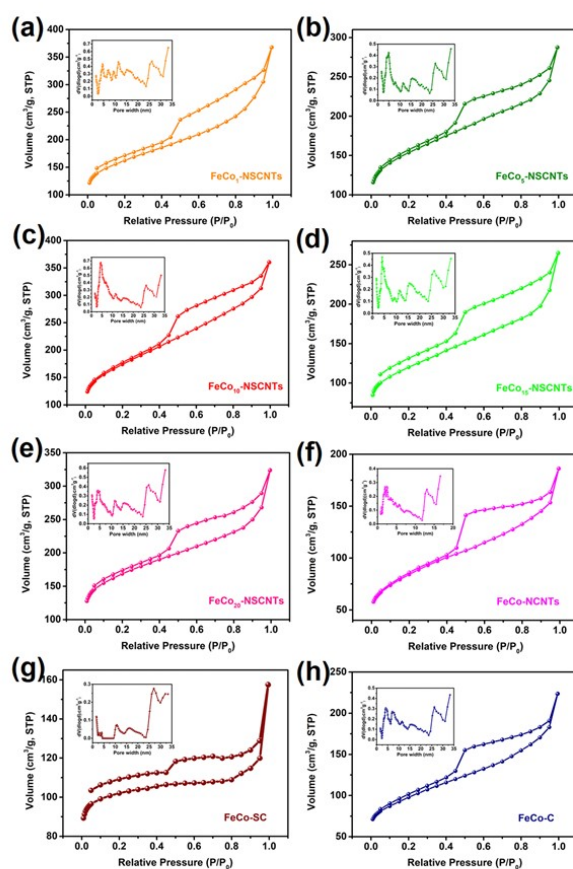

**Fig. S8** Nitrogen gas adsorption-desorption isotherms (the insert is pore-size distribution) of (a) FeCo<sub>1</sub>-NSCNTs, (b) FeCo<sub>5</sub>-NSCNTs, (c) FeCo<sub>10</sub>-NSCNTs, (d) FeCo<sub>15</sub>-NSCNTs, (e) FeCo<sub>20</sub>-NSCNTs, (f) FeCo-NCNTs, (g) FeCo-SC and (h) FeCo-C.

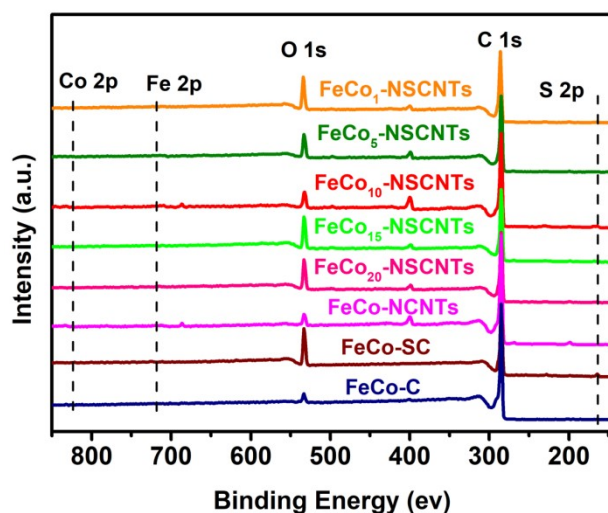

**Fig. S9** XPS spectra of FeCo<sub>1</sub>-NSCNTs, FeCo<sub>5</sub>-NSCNTs, FeCo<sub>10</sub>-NSCNTs, FeCo<sub>15</sub>-NSCNTs, FeCo<sub>20</sub>-NSCNTs, FeCo-NCNTs, FeCo-SC and FeCo-C.

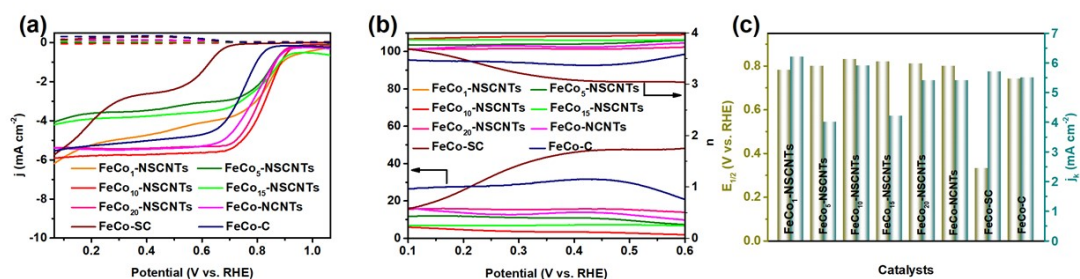

**Fig. S10** Electrocatalytic behavior in 0.1 M KOH: (a) LSV curves at a rotating speed of 1600 rpm at 10 mV s<sup>-1</sup>, (b) H<sub>2</sub>O<sub>2</sub> yields and n, (c) comparison E<sub>1/2</sub> and j<sub>k</sub> of FeCo<sub>1</sub>-NSCNTs, FeCo<sub>5</sub>-NSCNTs, FeCo<sub>10</sub>-NSCNTs, FeCo<sub>15</sub>-NSCNTs, FeCo<sub>20</sub>-NSCNTs, FeCo-NCNTs, FeCo-SC and FeCo-C.

**Table S1** The intensity ratios of the D band and G band, specific surface area,  $j_k$  and  $E_{1/2}$  of FeCo<sub>1</sub>-NSCNTs, FeCo<sub>5</sub>-NSCNTs, FeCo<sub>10</sub>-NSCNTs, FeCo<sub>15</sub>-NSCNTs, FeCo<sub>20</sub>-NSCNTs, FeCo-NCNTs, FeCo-SC and FeCo-C.

| Sample                     | $I_D/I_G$ | $S_{BET}$<br>(m <sup>2</sup> g <sup>-1</sup> ) | $j_k$<br>(mA cm <sup>-2</sup> ) | $E_{1/2}$<br>(V) |
|----------------------------|-----------|------------------------------------------------|---------------------------------|------------------|
| FeCo <sub>1</sub> -NSCNTs  | 1.31      | 531.27                                         | 6.18                            | 0.78             |
| FeCo <sub>5</sub> -NSCNTs  | 1.26      | 489.03                                         | 4.11                            | 0.80             |
| FeCo <sub>10</sub> -NSCNTs | 1.23      | 574.42                                         | 5.90                            | 0.83             |
| FeCo <sub>15</sub> -NSCNTs | 1.31      | 409.92                                         | 4.23                            | 0.82             |
| FeCo <sub>20</sub> -NSCNTs | 1.23      | 546.85                                         | 5.40                            | 0.81             |
| FeCo-NCNTs                 | 1.15      | 283.22                                         | 5.38                            | 0.80             |
| FeCo-SCNTs                 | 1.21      | 328.70                                         | 5.71                            | 0.33             |
| Fe/Co-C                    | 0.78      | 336.51                                         | 5.46                            | 0.74             |

**Table S2** The elemental contents of FeCo<sub>1</sub>-NSCNTs, FeCo<sub>5</sub>-NSCNTs, FeCo<sub>10</sub>-NSCNTs, FeCo<sub>15</sub>-NSCNTs, FeCo<sub>20</sub>-NSCNTs, FeCo-NCNTs, FeCo-SC and FeCo-C.

| Sample                      | C (at%) | N (at%) | O (at%) | S (at%) | Fe (at%) | Co (at%) |
|-----------------------------|---------|---------|---------|---------|----------|----------|
| Fe/Co <sub>1</sub> -NSCNTs  | 79.60   | 4.05    | 15.01   | 0.71    | 0.35     | 0.28     |
| Fe/Co <sub>5</sub> -NSCNTs  | 81.35   | 6.28    | 11.06   | 0.59    | 0.41     | 0.31     |
| Fe/Co <sub>10</sub> -NSCNTs | 81.69   | 9.63    | 6.52    | 1.45    | 0.47     | 0.24     |
| Fe/Co <sub>15</sub> -NSCNTs | 78.43   | 4.53    | 15.37   | 1.07    | 0.34     | 0.26     |
| Fe/Co <sub>20</sub> -NSCNTs | 79.38   | 4.90    | 14.36   | 0.79    | 0.38     | 0.29     |
| Fe/Co-NCNTs                 | 88.09   | 6.47    | 4.88    | ---     | 0.39     | 0.18     |
| Fe/Co-SCNTs                 | 79.54   | ---     | 18.00   | 1.74    | 0.41     | 0.31     |
| Fe/Co-C                     | 96.10   | ---     | 3.90    | ---     | ---      | ---      |
